# Supplementary material for: Hypoxia-inducible factor-1α-deficient adipose-tissue macrophages produce the heat to mediate lipolysis of white adipose tissue through uncoupling protein-1
Source: PubMed Central journal article supplement (PMC11523771; doi:10.1186/s42826-024-00224-4), 2024-10-30

# Supplementary figure 1

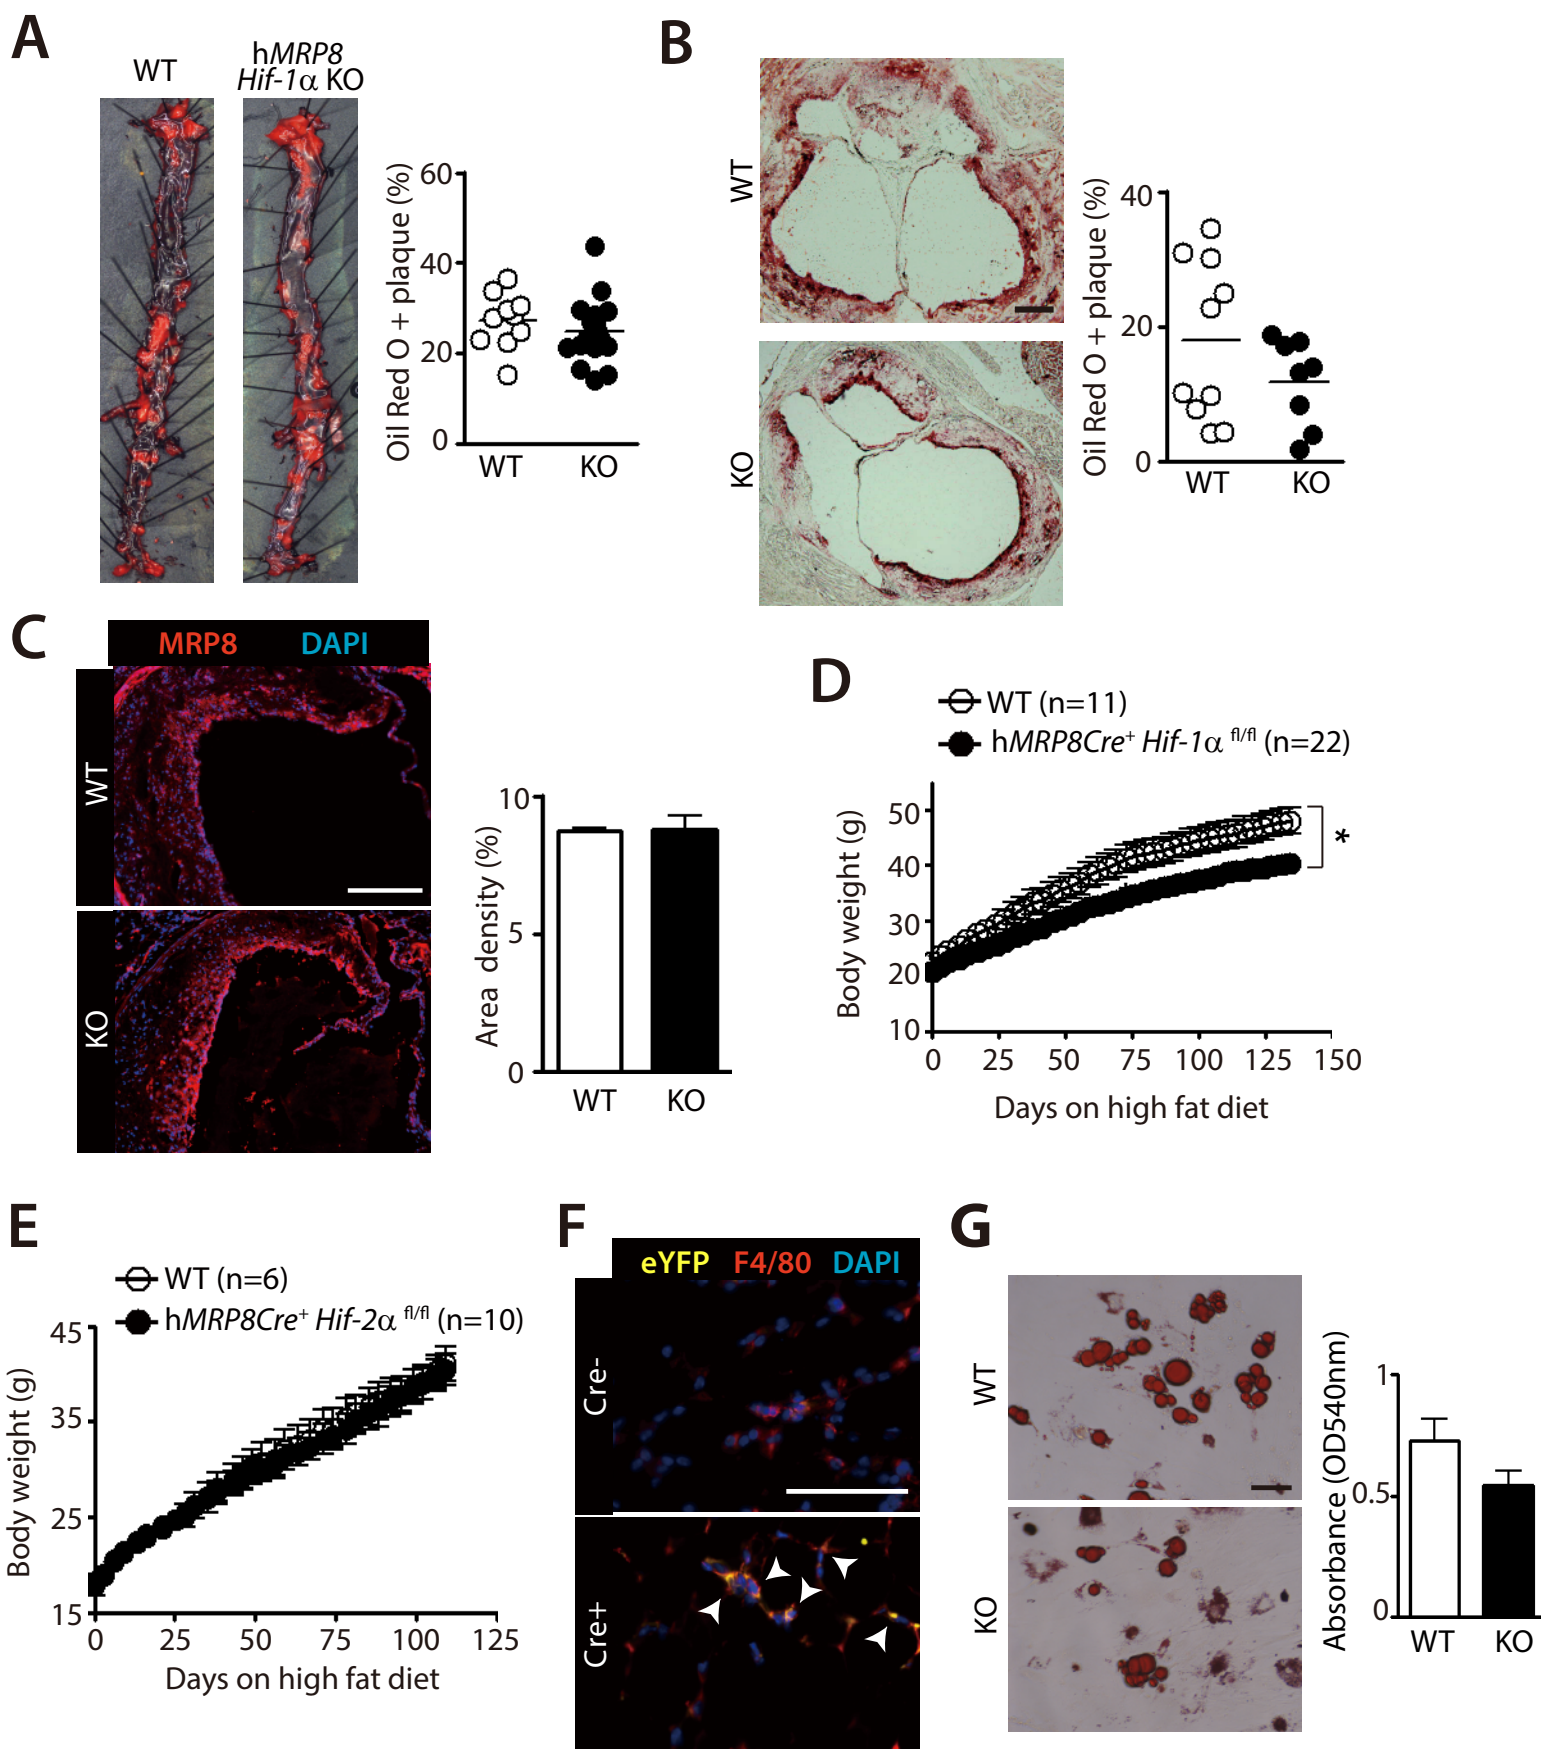

# Supplementary figure 2

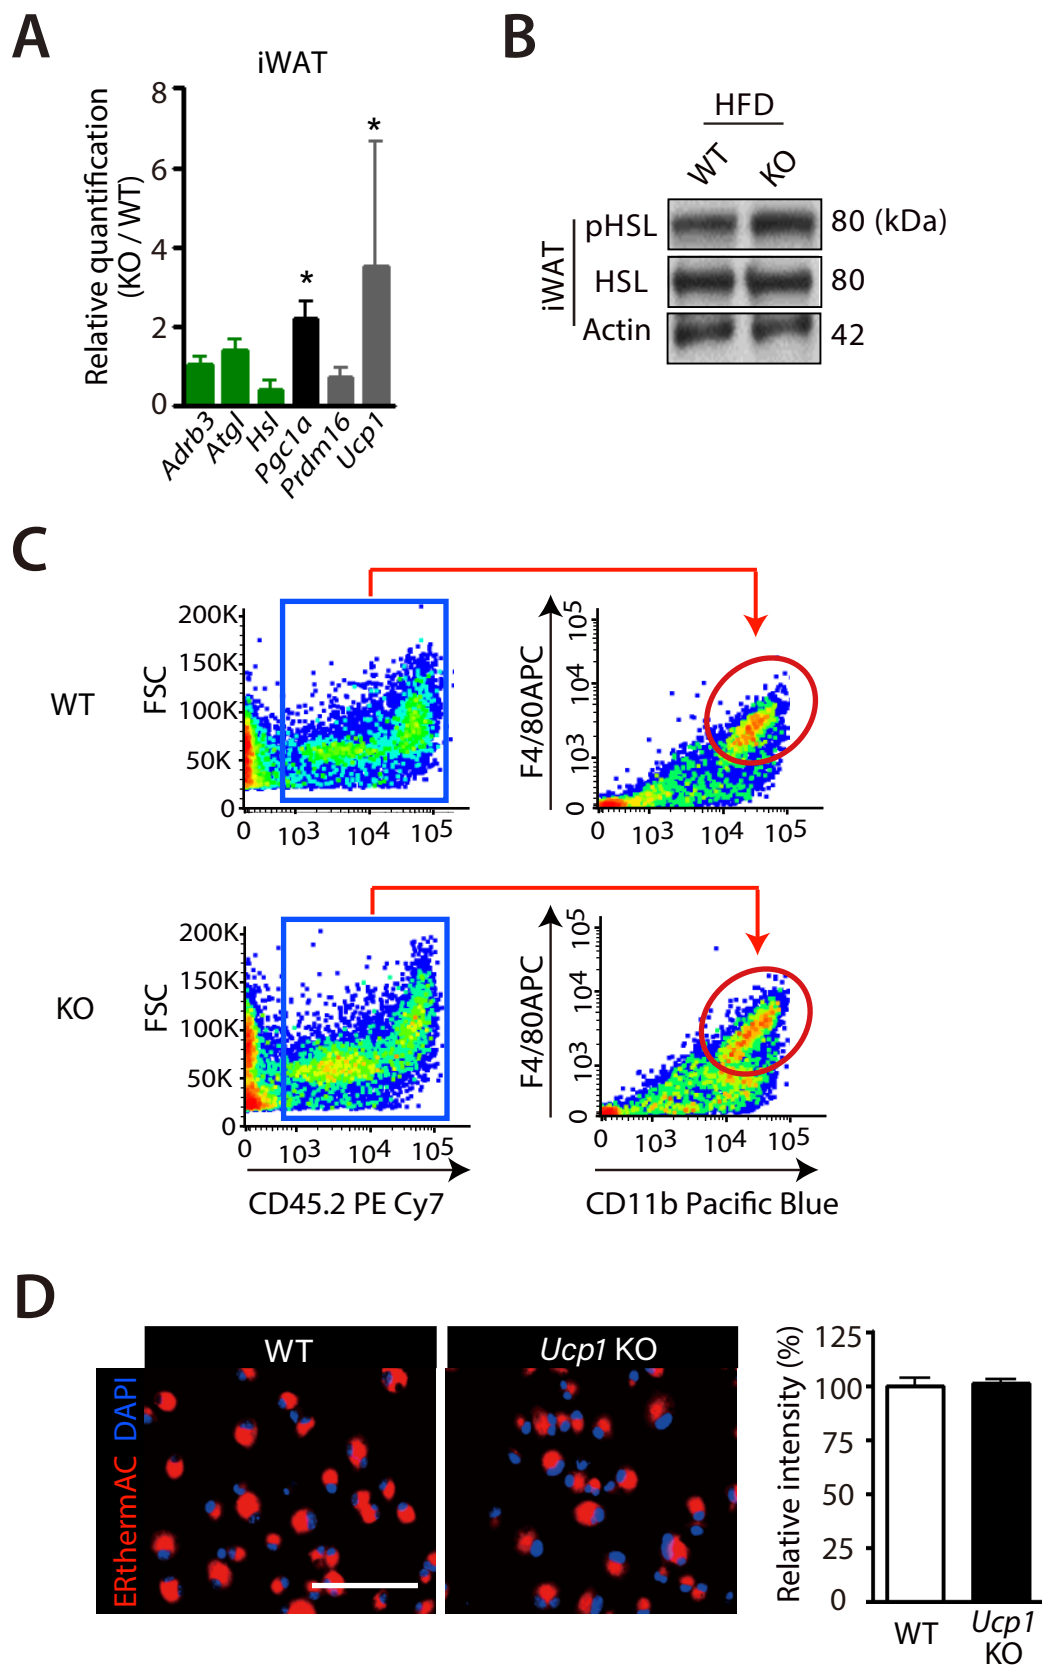

Supplement: 42826_2024_224_MOESM1_ESM.pdf [file 42826_2024_224_MOESM1_ESM.pdf]
